# Supplementary material for: Household economic burden of childhood severe pneumonia in Bangladesh: a cost-of-illness study
Source: HighWire-hosted journal article supplement (doi:10.1136/archdischild-2020-320834), 2021-04-27
Supplement: archdischild-2020-320834supp005_data_supplement.pdf [file archdischild-2020-320834supp005_data_supplement.pdf]

## Supplementary material 4

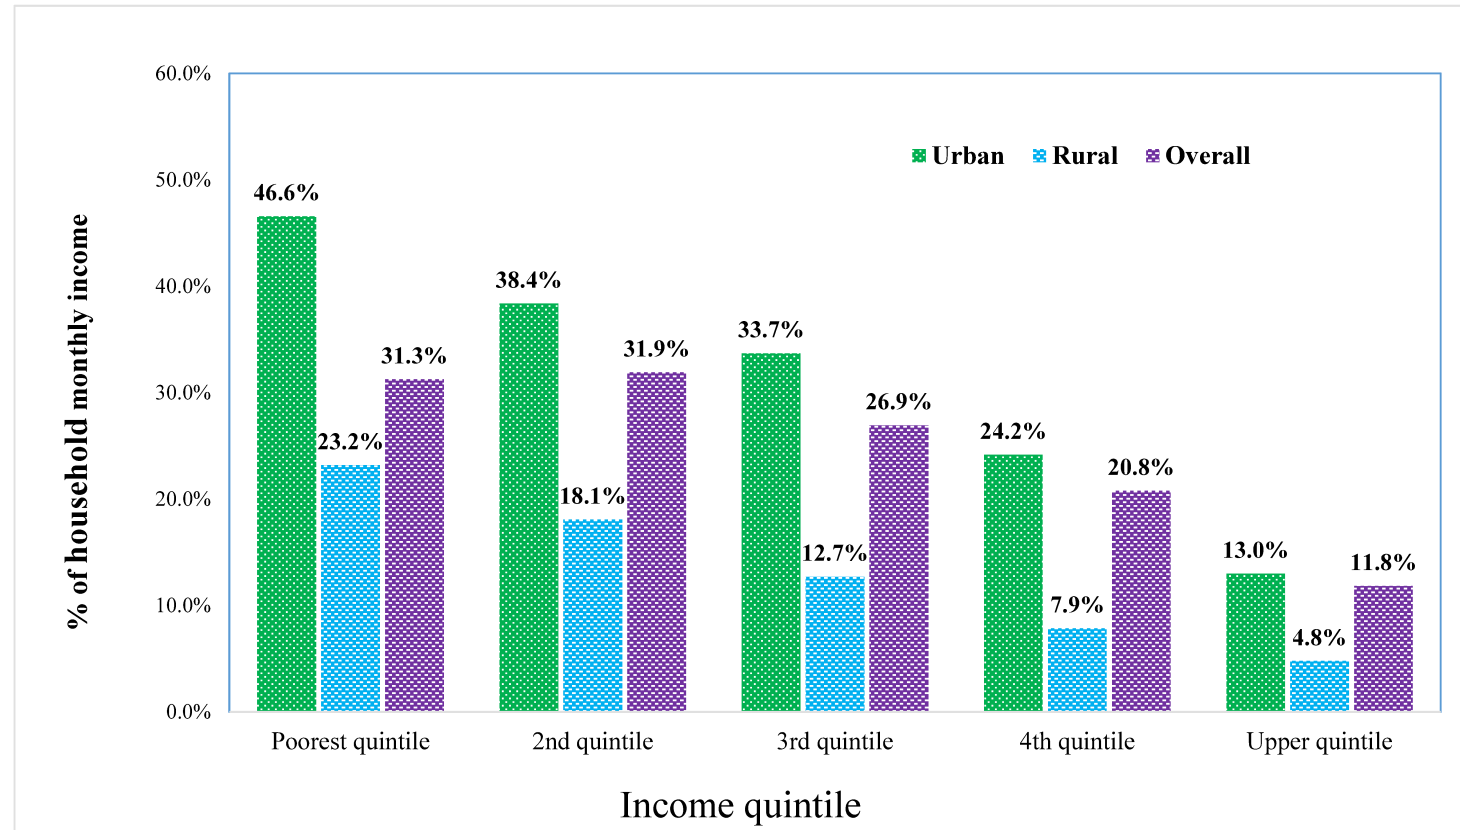

**Fig. S2.** Out-of-pocket (OOP) expenditure per episode of childhood severe pneumonia as a percentage of household's monthly income
